# Supplementary material for: Sustainable Antibacterial and Antiviral High-Performance Copper-Coated Filter Produced via Ion Beam Treatment
Source: MDPI journal article supplement (doi:10.3390/polym14051007), 2022-03-02
Supplement: s1 [file s1]

## Supplementary Materials

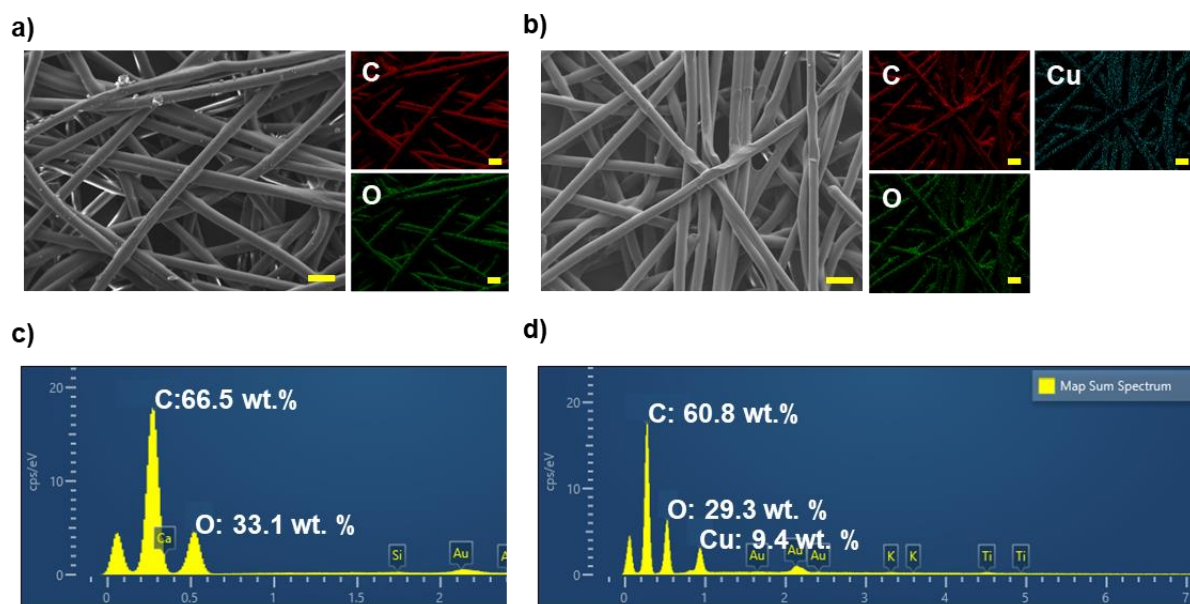

**Figure S1.** SEM (grayscale) and EDS mapping (color) images (scale bar: 100  $\mu\text{m}$ ) of the surfaces of the a) bare filter and b) copper-coated filter after ion beam treatment by Ion Beam 2. Atomic weight percentages of the surfaces of the c) bare filter and d) copper-coated filter after treatment by Ion Beam 2.

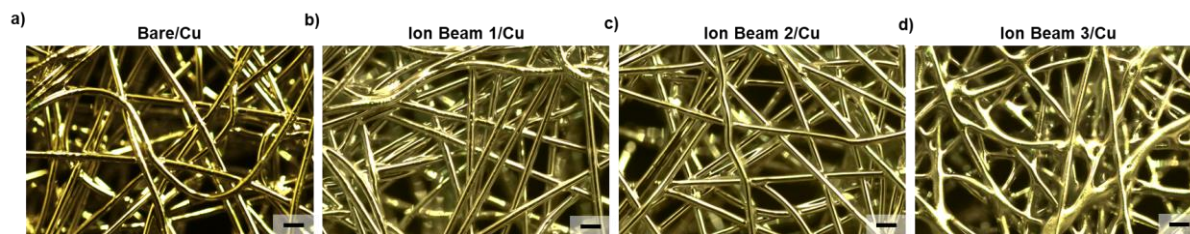

**Figure S2.** : Optical microscope images (obtained under ultraviolet light with a peak wavelength of 360 nm; scale bar: 100  $\mu\text{m}$ ) of copper-coated filters treated with a) no ion beam (bare filter), b) Ion Beam 1, c) Ion Beam 2, and d) Ion Beam 3.

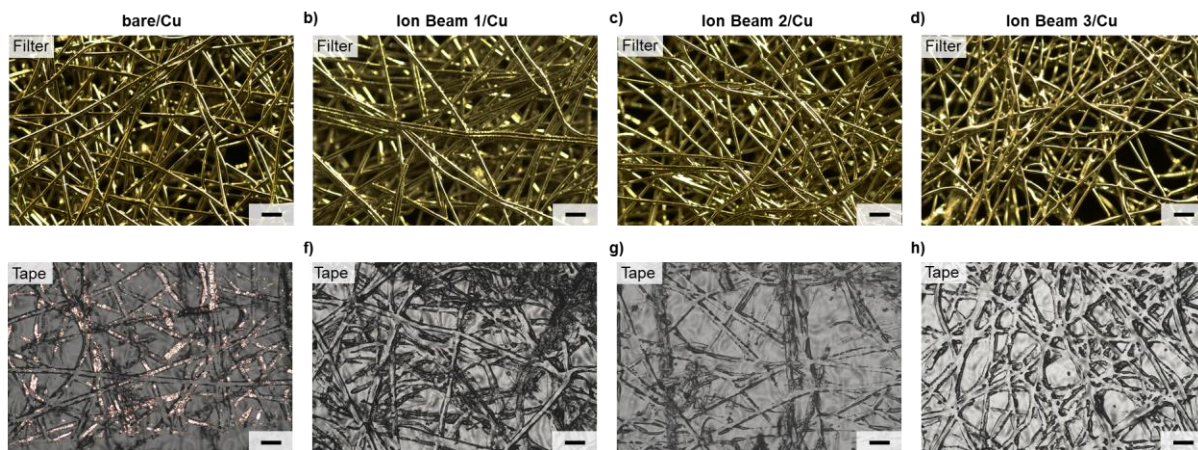

**Figure S3.** Optical microscope images (obtained under ultraviolet light with a peak wavelength of 360 nm; scale bar: 100  $\mu\text{m}$ ) of copper-coated filters after the peeling test and treated with a) no ion beam (bare filter), b) Ion Beam 1, c) Ion Beam 2, and d) Ion Beam 3. Optical microscope images (obtained under white light; scale bar: 100  $\mu\text{m}$ ) of the tape surfaces after the peeling test for e) no ion beam (bare filter), f) Ion Beam 1, g) Ion Beam 2, and h) Ion Beam 3.

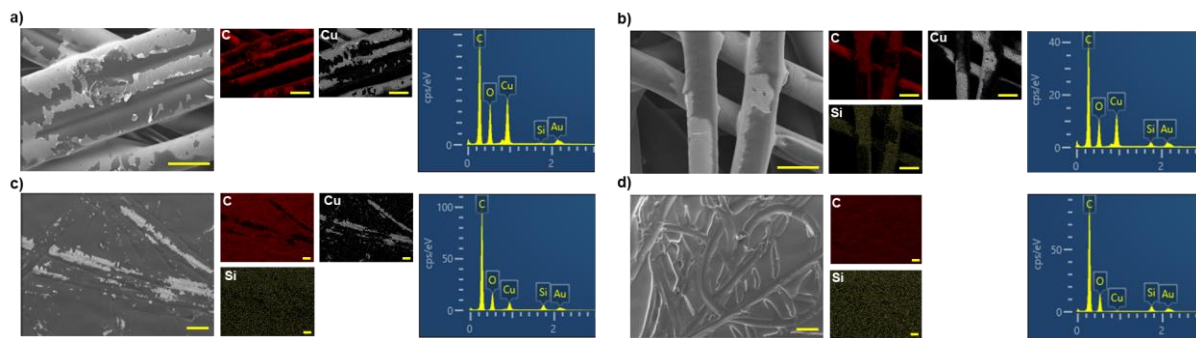

**Figure S4.** SEM and EDS mapping images (scale bar: 50  $\mu\text{m}$ ) of copper-coated filter surface after tape peeling test of a) bare and b) Ion Beam 1. SEM and EDS mapping images (scale bar: 100  $\mu\text{m}$ ) of tape surface after tape peeling test of a) bare and b) Ion Beam 1.

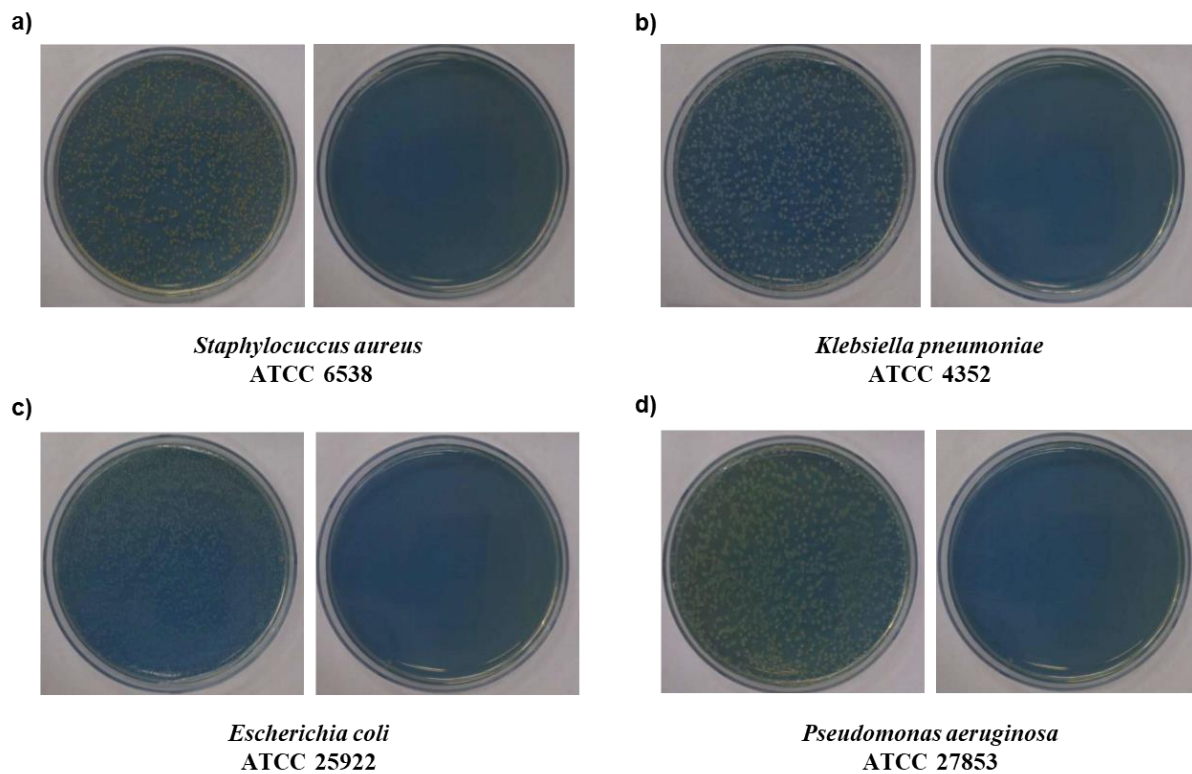

**Figure S5.** Antibacterial test results for a) *Staphylococcus aureus* ATCC 6538, b) *Klebsiella pneumoniae* ATCC 4352, c) *Escherichia coli* ATCC 25922, and d) *Pseudomonas aeruginosa* ATCC 27853. In each panel, the left column shows the control group exposed to the bare filter, and the right column shows the experimental group exposed to the copper-coated filter.

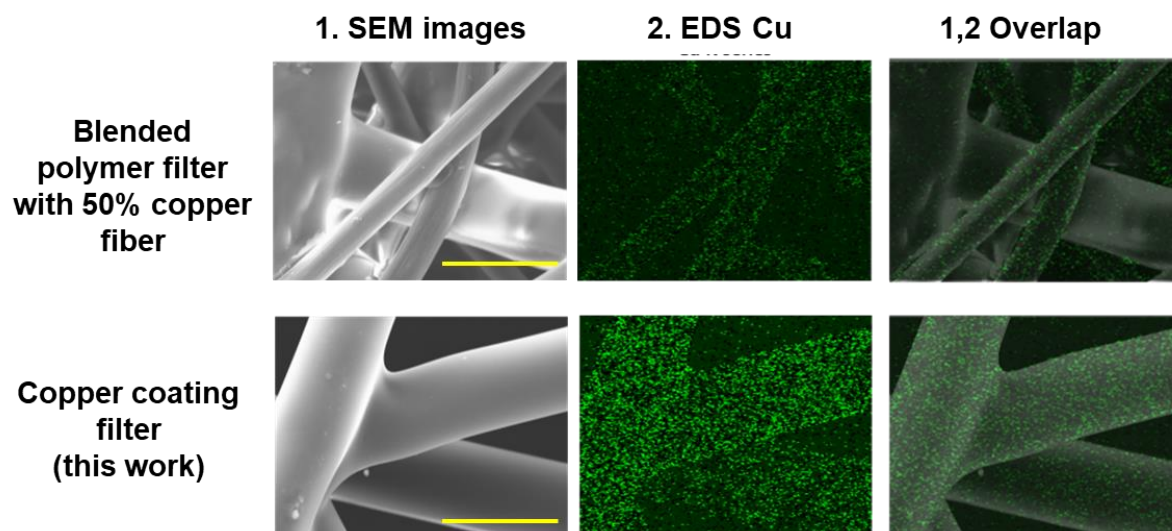

**Figure S6.** Differences in copper distribution between commercially available 50% copper fiber-blended polymer filters and copper-coated filters (this work). The copper exists only on thin fibers in the blended polymer filter. However, it is distributed evenly in the copper-coated filter.

**Table S1.** Vacuum ion-beam surface treatment and sputtering process conditions.

| Step 1                            | Ion Beam 1 | Ion Beam 2 | Ion Beam 3 |   | Step 2                            | Cu Sputtering |
|-----------------------------------|------------|------------|------------|---|-----------------------------------|---------------|
| Current (mA)                      | 50         | 100        | 100        |   | Gas / Flow rate (sccm)            | Ar / 40       |
| Applied voltage (kV)              | 0.6        | 1          | 2          | ➡ | Applied power (W)                 | 200 W         |
| Stage moving speed (meter/minute) | 0.1        | 0.1        | 0.1        |   | Stage moving speed (meter/minute) | 0.6           |
| Number of moving                  | 2          | 2          | 2          |   | Number of moving                  | 4             |
